# Supplementary material for: Properties of Lithium Trivanadate Film Electrodes Formed on Garnet-Type Oxide Solid Electrolyte by Aerosol Deposition
Source: PubMed Central journal article supplement (PMC6164746; doi:10.3390/ma11091570), 2018-09-01
Supplement: materials-11-01570-s001.pdf [file materials-11-01570-s001.pdf]

# Supplementary Information for Properties of Lithium Trivanadate Film Electrode Formed on Garnet- Type Oxide Solid Electrolyte by Aerosol Deposition

Ryoji Inada \*, Kohei Okuno, Shunsuke Kito, Tomohiro Tojo and Yoji Sakurai

Department of Electrical and Electronic Information Engineering, Toyohashi University of Technology, 1-1 Hibarigaoka, Tempaku-cho, Toyohashi, Aichi 441-8580, Japan

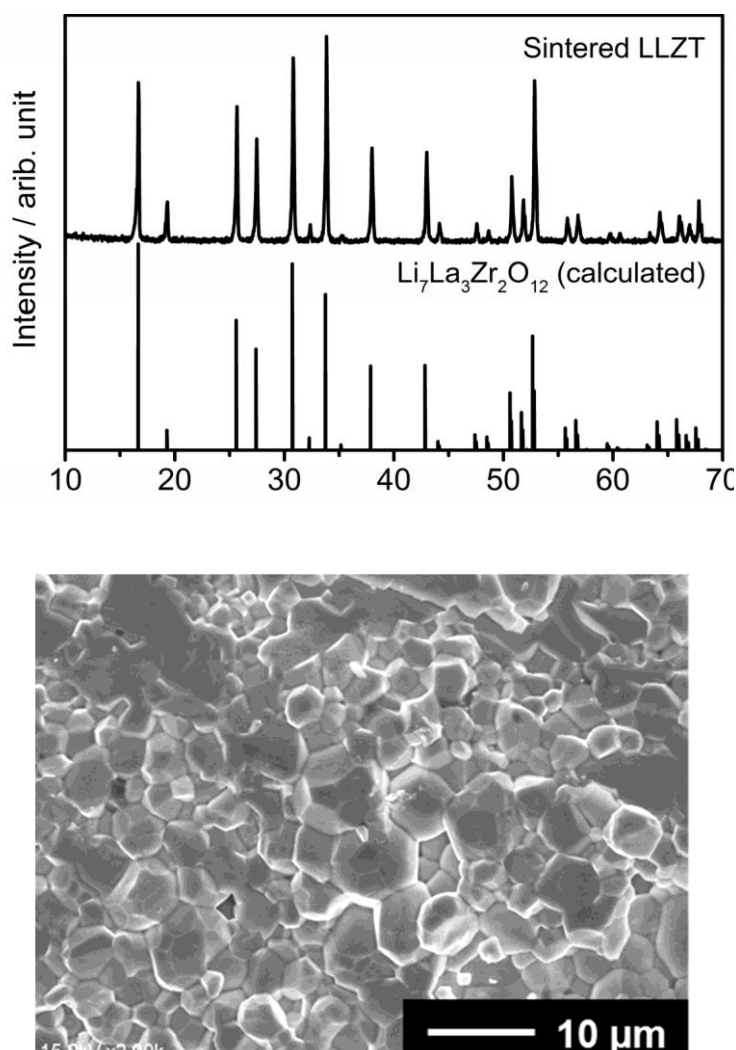

**Figure S1.** X-ray diffractometer (XRD) patterns (**top**) and scanning electron microscope (SEM) image (**bottom**) for sintered  $\text{Li}_{6.55}\text{La}_3\text{Zr}_{1.55}\text{Ta}_{0.45}\text{O}_{12}$  (LLZT) used in this work. LLZT has a cubic garnet structure without any impurity phases and a dense structure composed of LLZT grains with an average size of 5  $\mu\text{m}$ .

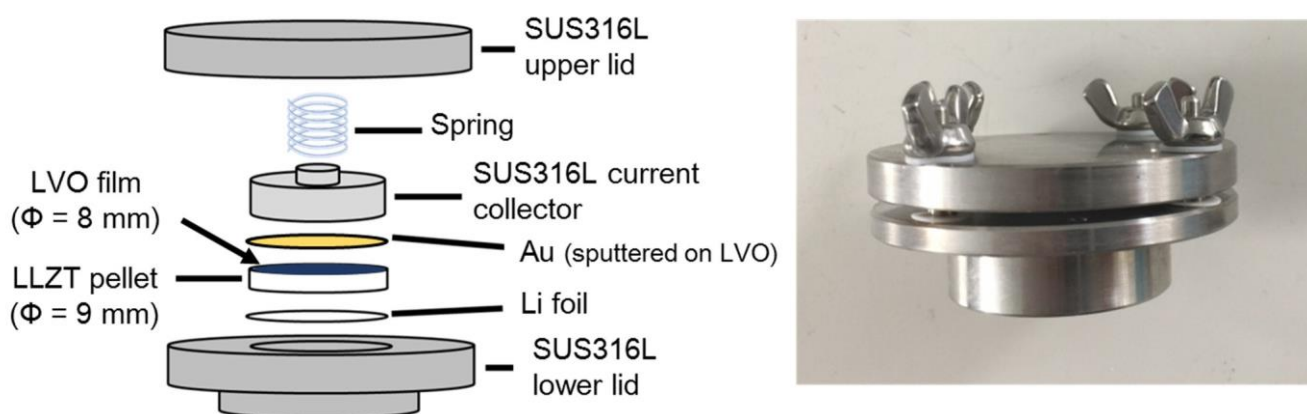

**Figure S2.** Illustration (left) and photo (right) of cell fixture for composing a  $\text{LiV}_3\text{O}_8$  (LVO)/LLZT/Li all-solid-state cell sample.

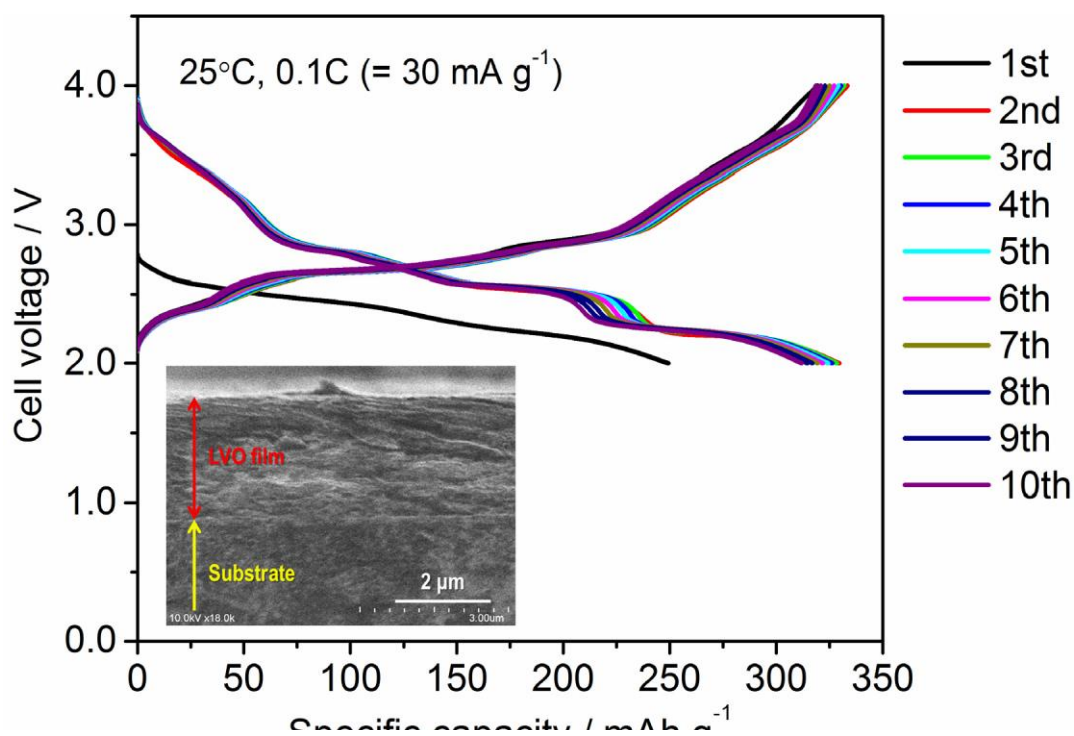

**Figure S3.** Galvanostatic charge and discharge curves for LVO film electrode (thickness = 2.5  $\mu\text{m}$ ) formed on a SUS316L plate in an organic liquid electrolyte. LVO film is used as working electrode, where as a single Li foil serves as both counter and reference electrodes. The electrolyte solution was 1 mol  $\text{LiPF}_6$  in a mixture of ethylene carbonate (EC) and dimethyl carbonate (DMC) with a volume ratio of 1:1. Together with Celgard 3501 as a separator, these components were assembled in a CR2032 coin type cell in a dry Ar filled glove box.

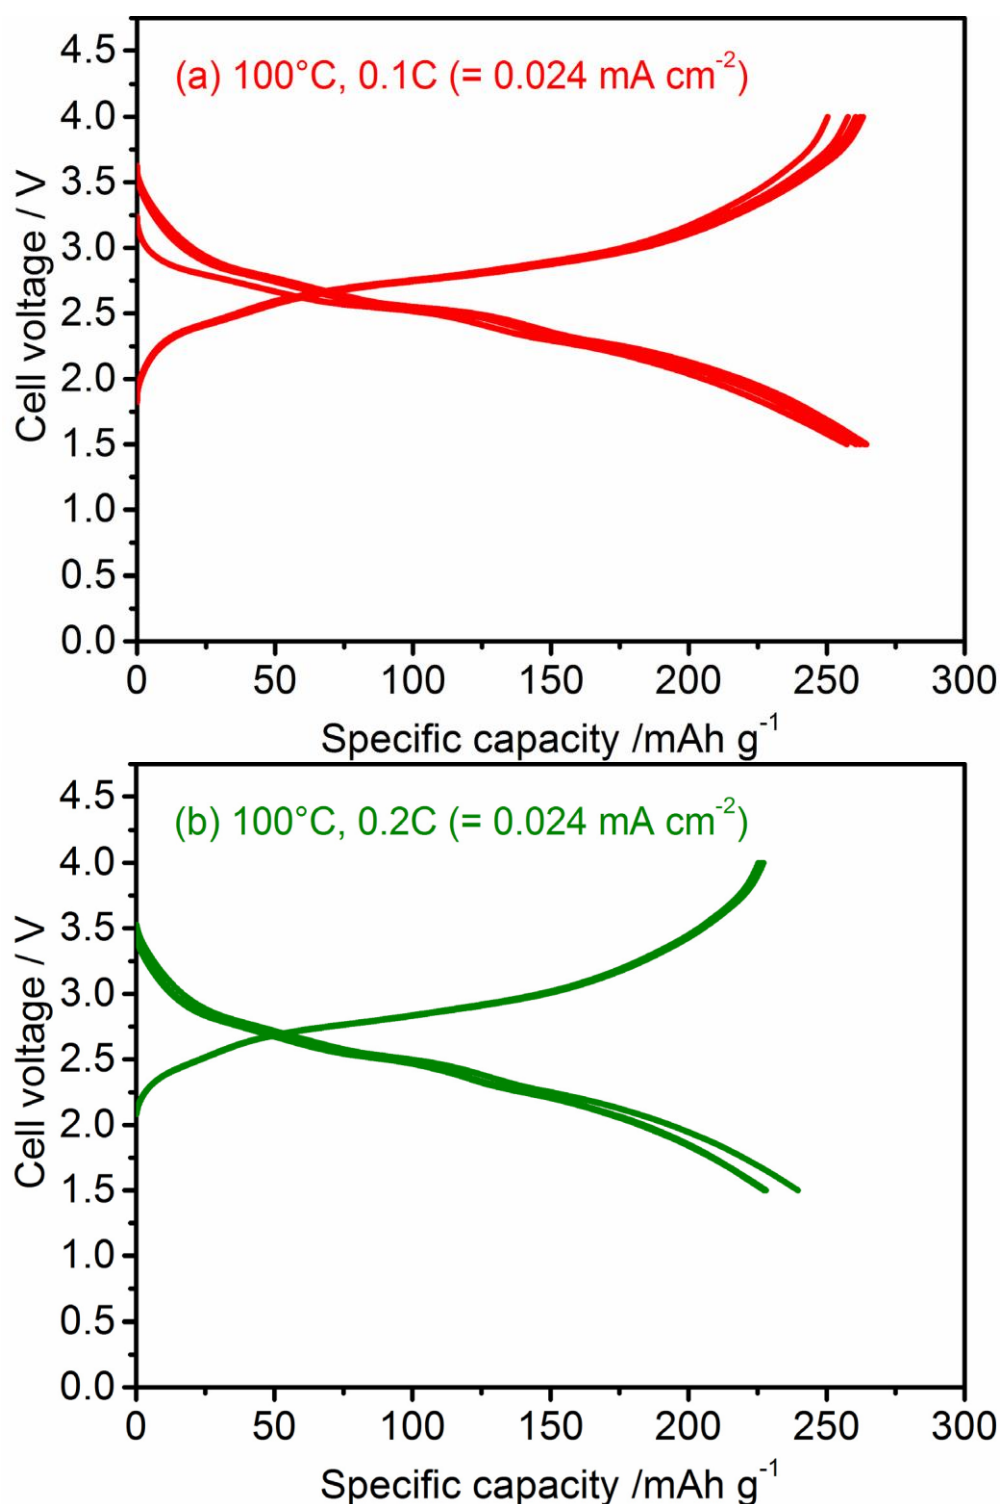

**Figure S4.** Galvanostatic charge and discharge curves for a LVO/LLZT/Li solid-state cell at 100 °C and different current densities: (a) 0.030 mA cm<sup>-2</sup>, (b) 0.060 mA cm<sup>-2</sup>, (c) 0.090 mA cm<sup>-2</sup>, (d) 0.120 mA cm<sup>-2</sup> and (e) 0.240 mA cm<sup>-2</sup>. The measurement at one specific current density is repeated for five cycles. Note that current density of 0.030 mA cm<sup>-2</sup> corresponds to 30 mA g<sup>-1</sup> for the LVO electrode.

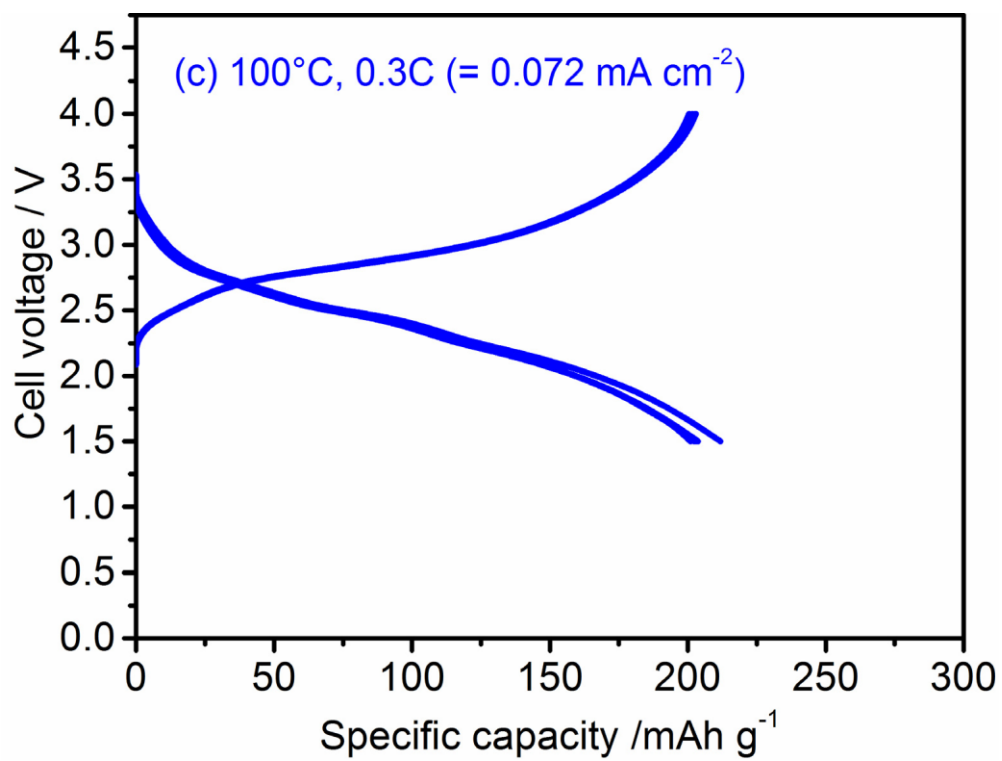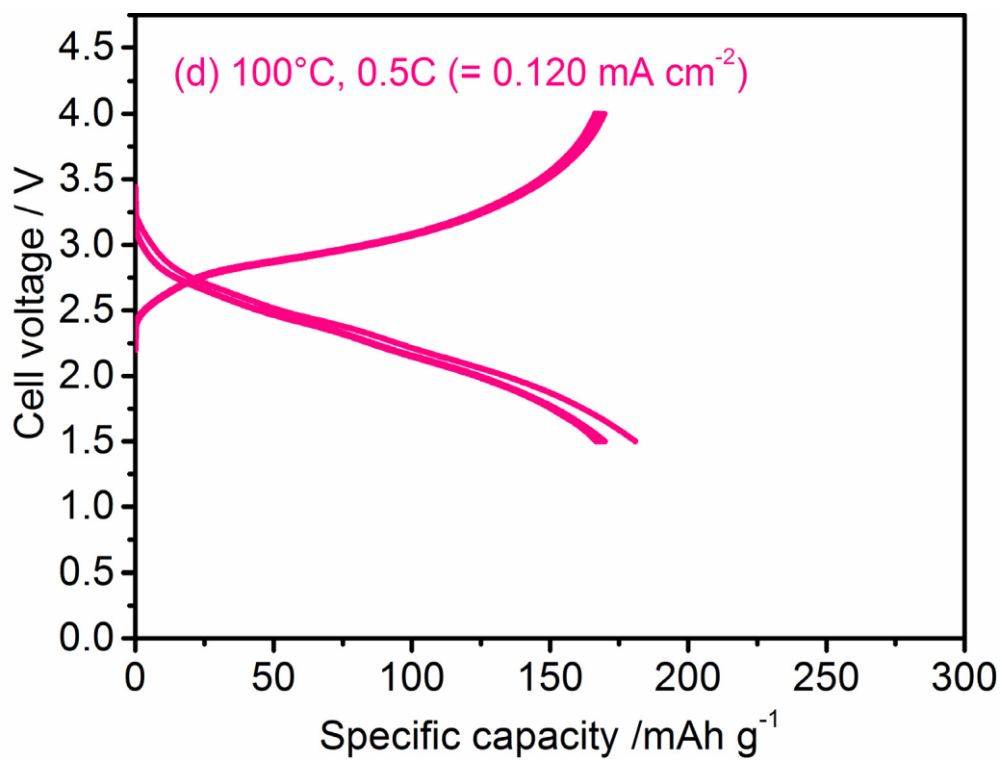

Figure S4. (Continued).

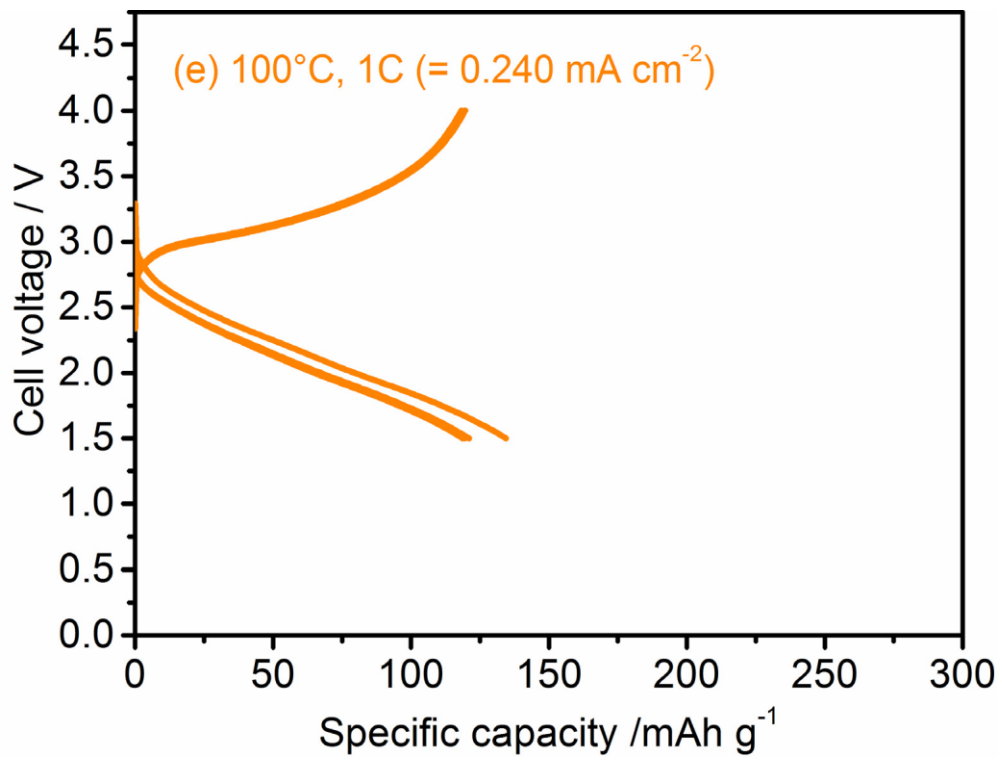

Figure S4. (Continued).
